# Supplementary material
Source: PubMed Central journal article supplement (PMC3125443)
Supplement: NIHMS293609-supplement-supplement_1.pdf [file NIHMS293609-supplement-supplement_1.pdf]

## Supplementary figures

# Rapid activity-induced transcription of *arc* and other IEGs relies on poised RNA polymerase II

Ramendra N. Saha<sup>1</sup>, Erin M. Wissink<sup>1,2</sup>, Emma R. Bailey<sup>1,2</sup>, Meilan Zhao<sup>1</sup>, David C. Fargo<sup>3</sup>, Ji-yeon Hwang<sup>1</sup>, Kelly R. Daigle<sup>1</sup>, J. Daniel Fenn<sup>1</sup>, Karen Adelman<sup>4</sup> and Serena M. Dudek<sup>1</sup>  
<sup>1</sup>Laboratory of Neurobiology; <sup>2</sup>Library and Information Services; <sup>3</sup>Laboratory of Molecular Carcinogenesis, NIEHS, NIH, 111 TW Alexander Drive, Research Triangle Park, North Carolina, USA, 27709

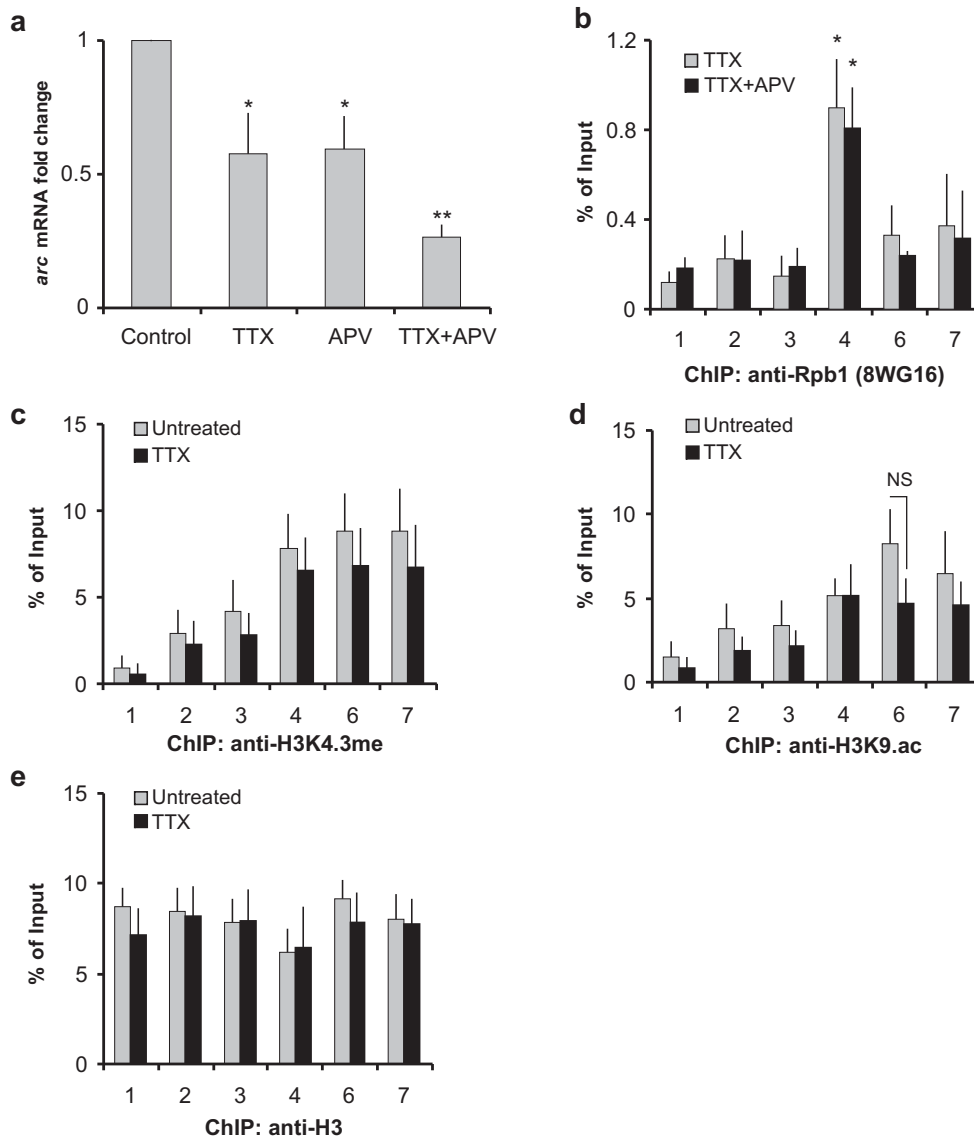

### Supplementary Figure 1. Pol II stalling and histone markers remain unaltered in silenced neurons.

Pol II enrichment near the *arc* TSS is maintained in neurons with diminished neuronal activity. (a) Level of *arc* mRNA after 48 hours treatment with TTX, 4 hours treatment with AP5, or both, as determined by qPCR and normalized to GAPDH.  $n = 3$ ; error bars represent s.e.m. (b) Quantification of RNA Pol II binding to the promoter region and gene body of *arc* as estimated by ChIP with anti-Rpb1 antibody in TTX or TTX+APV treated neurons.  $n = 3$ ; error bars represent s.d. \* $P < 0.05$ . (c, d, e) Quantification of tri-methylated H3 lysine 4 (c), acetylated H3 lysine 9 (d), and total H3 (e) near the *arc* TSS in untreated or TTX treated neurons as estimated by ChIP.  $n = 3$ ; error bars represent s.d. Note the relative abundance of the H3K4.3me and H3K9.ac near the TSS in both cases. NS = not significant.

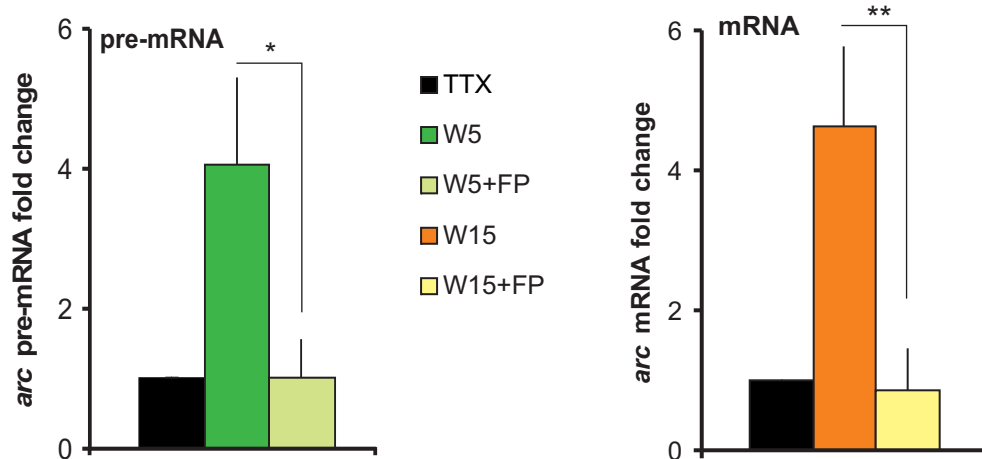

**Supplementary Figure 2. FP blocks upregulation of TTX withdrawal-induced *arc* pre-mRNA and mRNA.**

Graph representing the levels of *arc* pre-mRNA and mRNA in neurons treated as in Fig. 4(a), but harvested fifteen minutes after the washout (W15). The qPCR data was normalized to GAPDH.  $n = 3$ ; error bars represent s.e.m.

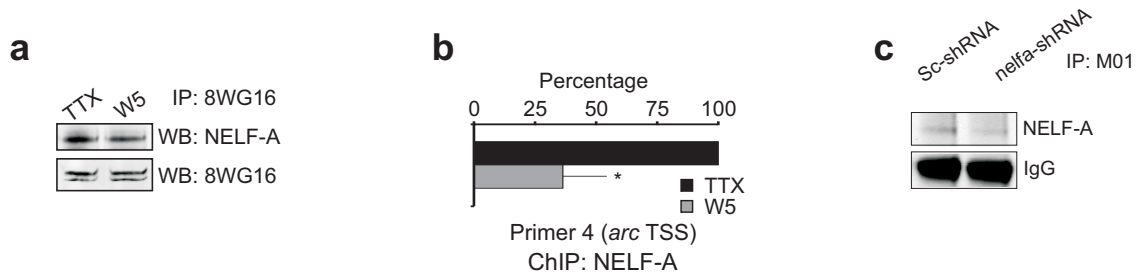

### Supplementary Figure 3. Association of NELF-A and Pol II.

(a) Coimmunoprecipitation was performed in nuclear extracts of indicated samples with 8WG16 antibody. Blots were probed with NELF-A antibody and re-probed with 8WG16. Representative figure of two independent trials. (b) Quantification of NELF-A at the *arc* TSS in indicated samples as determined by ChIP before and 5 minutes after TTX washout.  $n = 3$  biological trials; error bars represent S.D. of the mean. Note the drop in NELF binding to the *arc* promoter. (c) Co-Immunoprecipitation was performed in nuclear extracts of indicated samples with Pol II (M01) antibody. The blot was probed with NELF-A antibody. Representative figure of two independent trials. Note the diminished interaction of Pol II with NELF-A after the later was knocked down.

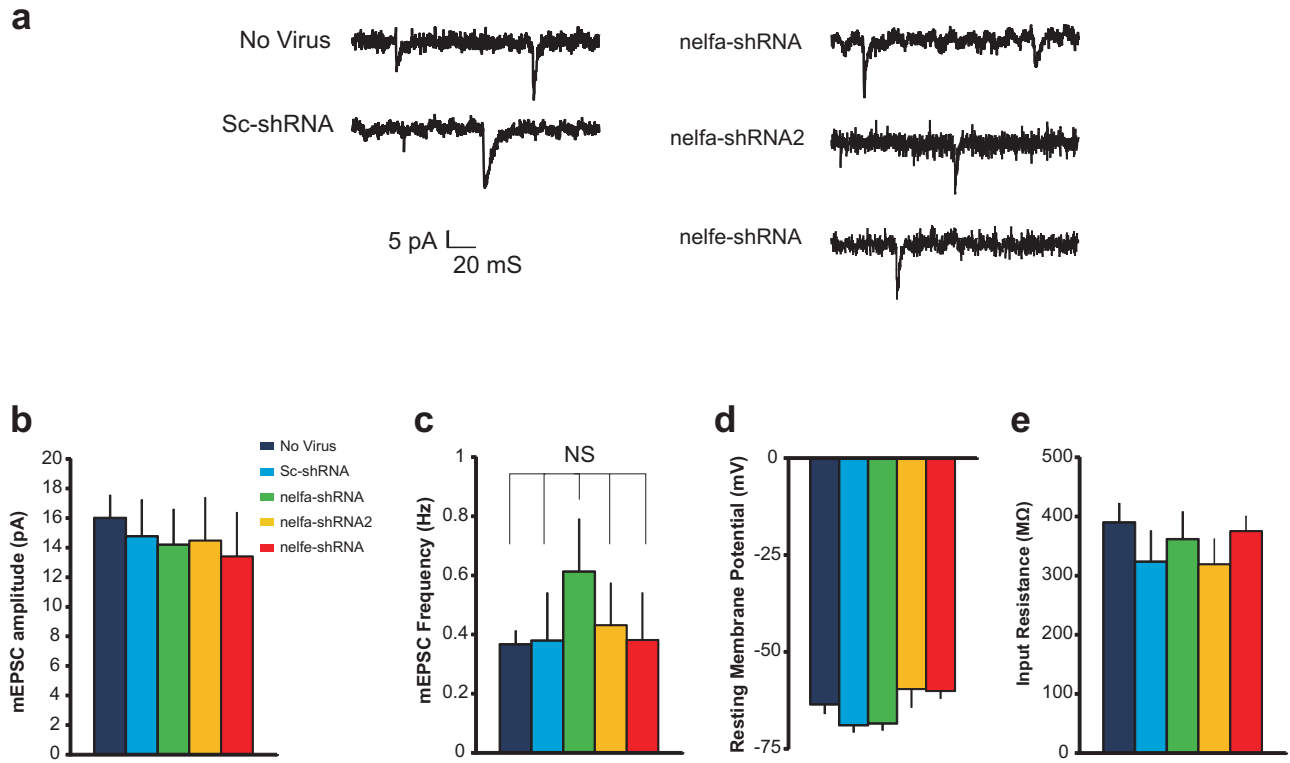

**Supplementary Figure 4. NELF-A knockdown does not interfere with neuronal activity.**

Representative mEPSC traces (a) and summary graphs of mEPSC amplitude (b), mEPSC frequencies (c), resting membrane potentials (d), and input resistances (e) recorded from uninfected neurons (n = 9) and neurons infected with lentivirus expressing a scrambled sequence (n = 7), NELF-A shRNA (n = 10), NELF-A shRNA2 (n = 6) and NELF-E shRNA (n = 8).

No significant effect of NELF-A or NELF-E knockdown was observed. Error bars represent s.e.m.

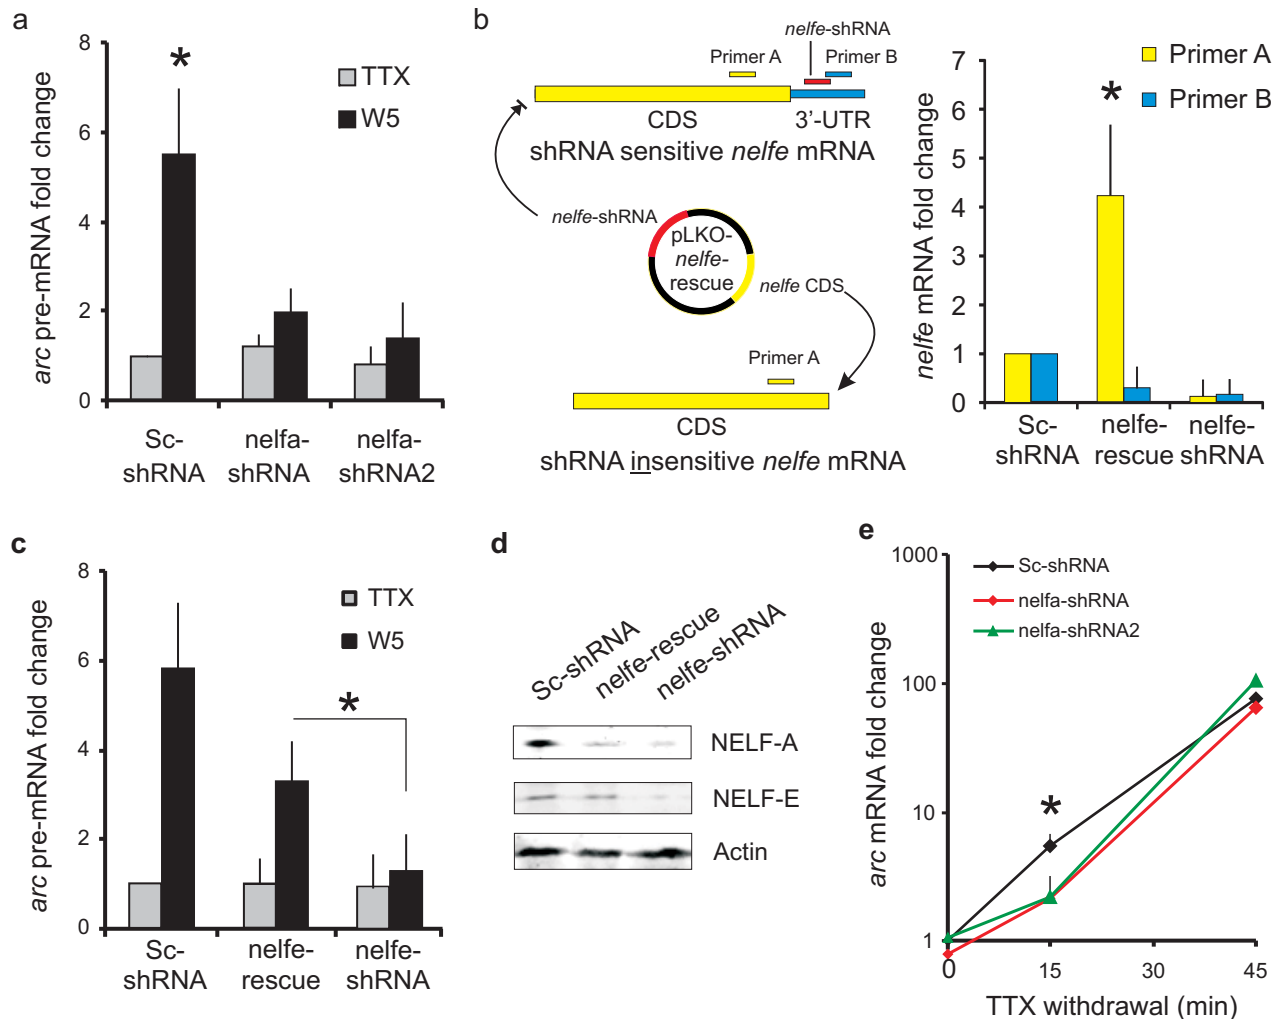

### Supplementary Figure 5. Studies with an alternate NELF-A shRNA and NELF-E rescue.

(a) Graphical representation of *arc* pre-mRNA levels in neurons infected with scrambled, *nelfa*-shRNA or *nelfa*-shRNA2 producing lentiviruses for indicated treatment ( $n = 3$ ,  $P < 0.01$ ).

(b) Illustration showing the cloning strategy to create shRNA insensitive *nelfe* (left) and *nelfe* mRNA levels in neurons infected with scrambled, *nelfe*-shRNA+rescue, or *nelfe*-shRNA producing lentiviruses ( $n = 3$ ,  $P < 0.05$ ). Note that the *nelfe* mRNA was rescued from the exogenous construct (right) after loss of endogenous mRNA (as reported by Primer B).

(c) Graphical representation of *arc* pre-mRNA levels in neurons infected with scrambled, *nelfe*-shRNA or *nelfe*-shRNA+rescue producing lentiviruses for indicated treatment ( $n = 5$ ,  $P < 0.05$ ).

(d) Neurons were infected with indicated viruses and nuclear extract was prepared from them after seven days. These extracts were separated by electrophoresis and were western blotted for the indicated proteins. Note the loss of NELF-A protein despite rescue of NELF-E.

(e) *arc* mRNA levels in neurons infected with scrambled, *nelfa*-shRNA or *nelfa*-shRNA2 producing lentiviruses for indicated lengths of treatment ( $n = 3$ ,  $P < 0.05$ ).

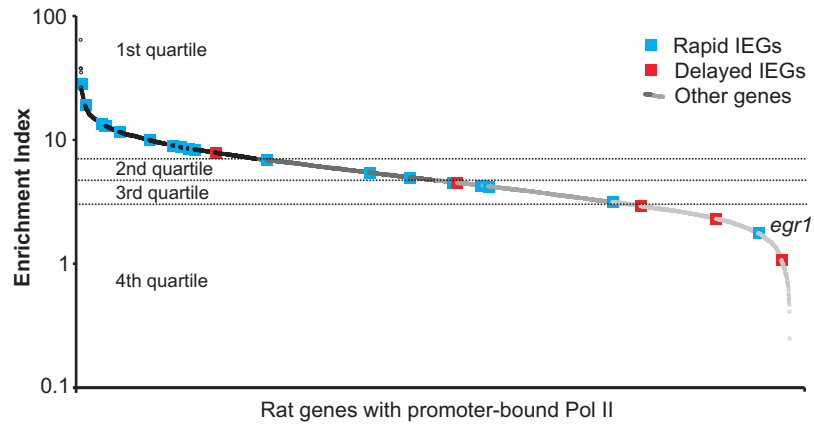

**Supplementary Figure 6. Distribution of the stalling indices for all bound genes.**

After size exclusion (see Methods), stalling indices were computed for 7324 bound genes and are represented above. Note that the majority of rapid-IEGs have high indices and reside in the top three quartile except *egr1* (marked), which had a significant Pol II enrichment as detected using the 8WG16 antibody (See Fig. 6e).

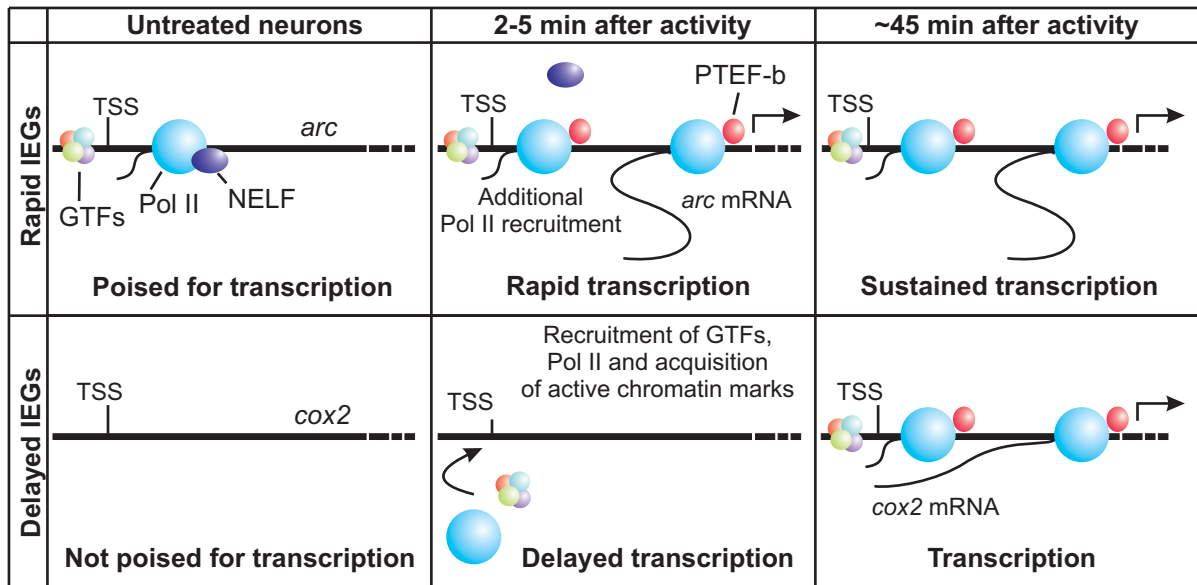

### Supplementary Figure 7. Synopsis.

The NELF-mediated Pol II stalling near promoters of rapid IEGs (e.g. *arc*) poise them for rapid transcription within 2-5 minutes of activity. The presence of P-TEFb promotes the entry of stalled Pol II into the productive elongation phase. Moreover, the stalling of the pioneer Pol II facilitates the recruitment of additional Pol II to these promoters pre-loaded with general transcription factors (GTFs) and active histone marks. Freshly recruited Pol II can then re-initiate successive rounds of transcription resulting in a quick burst of the gene product. In contrast, delayed IEGs (e.g. *cox2*) lack Pol II stalling near their promoter and are therefore not poised for rapid expression. Instead, they must undergo transcription initiation, which includes recruitment of GTFs, Pol II and acquisition of histone modifications. Thus, delayed IEGs manifest slower expression kinetics.

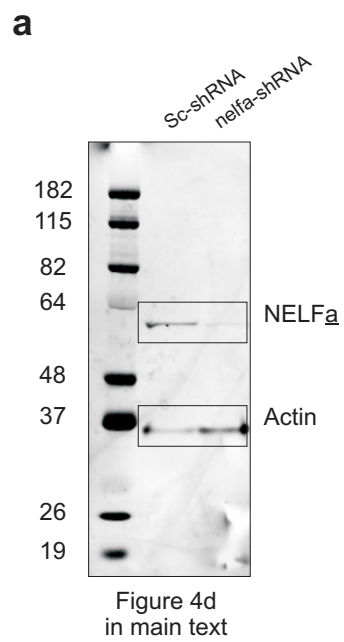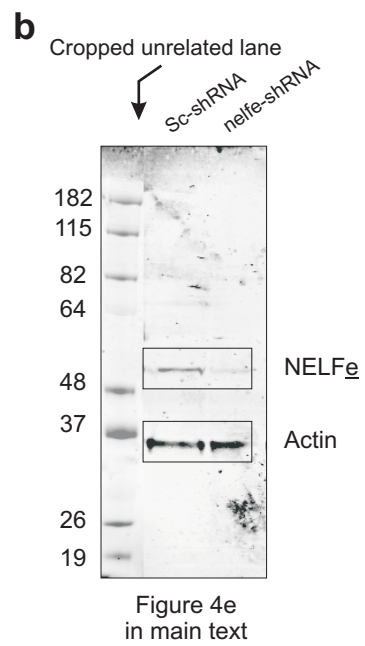

**Supplementary Figure 8. Full length blots.**



| Gene name | Accession    | Ensembl Gene ID  | Chr | Orientation | Gene Start  | Gene Stop   | Category | Validation                   |
|-----------|--------------|------------------|-----|-------------|-------------|-------------|----------|------------------------------|
| Npas4     | NM_153626    | SRNOG000000200   | 1   | Minus       | 207,597,736 | 207,602,499 | Rapid    | MicArr, qRT-PCR, 1-step qPCR |
| Fos       | XM_234422    | ENSRNOG000000000 | 6   | Plus        | 109,559,154 | 109,562,546 | Rapid    | MicArr, qRT-PCR, 1-step qPCR |
| Junb      | NM_021836    | SRNOG000000042   | 19  | Plus        | 24,831,535  | 24,833,318  | Rapid    | MicArr                       |
| Egr4      | NM_019137    | ENSRNOG000000000 | 4   | Minus       | 119,767,612 | 119,765,288 | Rapid    | MicArr, qRT-PCR              |
| ania-5    | AF030090     | ?                | 2   | Plus        | 23,582,120  | 23,585,777  | Rapid    | MicArr                       |
| Egr1      | NM_012551    | SRNOG000000019   | 18  | Plus        | 27,342,193  | 27,347,352  | Rapid    | MicArr, qRT-PCR, 1-step qPCR |
| Mbnl2     | AA875457     | ENSRNOG000000000 | 15  | Plus        | 105,356,456 | 105,514,135 | Rapid    | MicArr                       |
| NR4a3     | NM_017352    | SRNOG000000005   | 5   | Plus        | 64,713,468  | 64,753,304  | Rapid    | MicArr                       |
| Arc       | NM_019361    | SRNOG000000043   | 7   | Minus       | 112,775,381 | 112,771,938 | Rapid    | MicArr, qRT-PCR, 1-step qPCR |
| Arf4      | AA956116     | SRNOG000000012   | 16  | Plus        | 1,955,745   | 1,972,321   | Rapid    | MicArr                       |
| Gadd45g   | XM_237999    | ENSRNOG000000000 | 17  | Minus       | 19,230,896  | 19,232,641  | Rapid    | MicArr, qRT-PCR              |
| Egr2      | NM_053633    | SRNOG000000000   | 20  | Minus       | 21,883,889  | 21,888,177  | Rapid    | MicArr, qRT-PCR              |
| Arih1     | AW144003     | ENSRNOG000000000 | 8   | Minus       | 63,201,872  | 63,305,302  | Rapid    | MicArr                       |
| Ier2      | NM_001009541 | SRNOG000000002   | 19  | Plus        | 25,159,276  | 25,160,796  | Rapid    | MicArr, qRT-PCR              |
| Olr670    | NM_001000633 | ENSRNOG000000000 | 3   | Minus       | 73,204,873  | 73,203,940  | Delayed  | MicArr, 1-step qPCR          |
| Cyr61     | NM_031327    | SRNOG000000014   | 2   | Minus       | 243,827,262 | 243,824,303 | Rapid    | MicArr, 1-step qPCR          |
| Gadd45b   | NM_001008321 | ENSRNOG000000000 | 7   | Minus       | 10,291,102  | 10,289,073  | Rapid    | MicArr, 1-step qPCR          |
| Nup98     | AI176079     | SRNOG000000020   | 1   | Minus       | 159,696,720 | 159,598,049 | Rapid    | MicArr, 1-step qPCR          |
| Egr3      | NM_017086    | ENSRNOG000000000 | 15  | Plus        | 50,477,453  | 50,479,908  | Delayed  | MicArr, qRT-PCR, 1-step qPCR |
| Fosl2     | NM_012954    | ENSRNOG000000000 | 6   | Minus       | 23,832,427  | 23,749,170  | Delayed  | MicArr, 1-step qPCR          |
| Rasl11a   | NM_001002829 | SRNOG000000000   | 12  | Minus       | 8,710,040   | 8,705,994   | Delayed  | MicArr, 1-step qPCR          |
| Nur77     | NM_024388    | ENSRNOG000000000 | 7   | Plus        | 140,012,807 | 140,020,587 | Delayed  | MicArr, qRT-PCR, 1-step qPCR |
| Jun       | BC078738     | ENSRNOG000000000 | 5   | Minus       | 115,360,401 | 115,359,397 | Delayed  | MicArr, 1-step qPCR          |
| Ccno      | BF403931     | ENSRNOG000000000 | 2   | Plus        | 44,377,953  | 44,381,020  | Delayed  | MicArr, 1-step qPCR          |
| Nfkbid    | XM_218484    | SRNOG000000025   | 1   | Plus        | 85,377,148  | 85,383,179  | Delayed  | MicArr, 1 step-qPCR          |
| Dusp1     | NM_053769    | ENSRNOG000000000 | 10  | Plus        | 16,942,927  | 16,945,694  | Rapid    | MicArr, 1-step qPCR          |
| Dusp6     | U42627       | ENSRNOG000000000 | 7   | Plus        | 36,893,264  | 36,897,493  | Rapid    | MicArr, 1-step qPCR          |
| Trib1     | AI230116     | ENSRNOG000000000 | 7   | Plus        | 96,442,239  | 96,448,785  | Delayed  | MicArr, 1-step qPCR          |
| Kcnf1     | XM_216678    | ENSRNOG000000000 | 6   | Minus       | 40,913,068  | 40,910,396  | Delayed  | MicArr, 1-step qPCR          |
| PPP1r15a  | NM_133546    | ENSRNOG000000000 | 1   | Minus       | 95,997,080  | 95,994,025  | Rapid    | MicArr, 1-step qPCR          |
| Nurr1     | NM_019328    | ENSRNOG000000000 | 3   | Minus       | 38,871,678  | 38,866,212  | Delayed  | MicArr, qRT-PCR, 1-step qPCR |
| Fam46b    | XM_232748    | SRNOG000000007   | 5   | Minus       | 151,612,602 | 151,605,299 | Delayed  | MicArr, 1-step qPCR          |
| Ch25h     | XM_220063    | ENSRNOG000000000 | 1   | Minus       | 238,458,335 | 238,457,020 | Delayed  | MicArr, 1-step qPCR          |
| Btg2      | NM_017259    | ENSRNOG000000000 | 13  | Minus       | 47,030,704  | 47,026,983  | Rapid    | MicArr, 1-step qPCR          |

|            |           |                |    |       |             |             |         |                              |
|------------|-----------|----------------|----|-------|-------------|-------------|---------|------------------------------|
| Fam46a     | XM_217218 | ENSRNOG000000C | 8  | Minus | 90,506,129  | 90,502,441  | Delayed | MicArr, 1-step qPCR          |
| Nfil3      | NM_053727 | ENSRNOG000000C | 17 | Plus  | 18,092,489  | 18,107,705  | Delayed | MicArr, 1-step qPCR          |
| Ifng       | NM_138880 | ENSRNOG000000C | 7  | Plus  | 57,621,756  | 57,625,792  | Delayed | MicArr, 1-step qPCR          |
| Klf4       | NM_053713 | ENSRNOG000000C | 5  | Minus | 73,451,286  | 73,446,930  | Delayed | MicArr, 1-step qPCR          |
| Tiparp/RM1 | AB032087  | ENSRNOG000000C | 2  | Plus  | 155,312,341 | 155,339,357 | Delayed | MicArr, 1-step qPCR          |
| Dusp5      | NM_133578 | SRNOG00000014C | 1  | Plus  | 259,754,234 | 259,767,645 | Delayed | MicArr, 1-step qPCR          |
| Fbxo33     | XM_234205 | ENSRNOG000000C | 6  | Minus | 79,934,591  | 79,902,508  | Rapid   | MicArr, 1-step qPCR          |
| Fosl1      | NM_012953 | ENSRNOG000000C | 1  | Plus  | 208,090,612 | 208,099,118 | Delayed | MicArr, 1-step qPCR          |
| Cartpt     | NM_017110 | ENSRNOG000000C | 2  | Minus | 30,891,837  | 30,889,817  | Delayed | MicArr, 1-step qPCR          |
| Maff       | XM_345857 | ENSRNOG000000C | 7  | Plus  | 117,328,924 | 117,340,276 | Delayed | MicArr, 1-step qPCR          |
| Cox2/Ptgs2 | NM_017232 | ENSRNOG000000C | 13 | Plus  | 64,427,288  | 64,432,982  | Delayed | MicArr, 1-step qPCR          |
| Klf14      | AW534376  | ENSRNOG000000C | 4  | Minus | 58,013,460  | 58,010,538  | Delayed | MicArr, 1-step qPCR          |
| Vgf        | NM_030997 | ENSRNOG000000C | 12 | Plus  | 20,903,304  | 20,906,327  | Delayed | MicArr, qRT-PCR, 1-step qPCR |
| Bdnf       | NM_012513 | ?              | 3  | Plus  | 949,646     | 979,996     | Delayed | MicArr, 1-step qPCR          |
| Edn1       | NM_012548 | ENSRNOG000000C | 17 | Minus | 28,309,775  | 28,303,886  | Delayed | MicArr, 1-step qPCR          |

| Gene name | TTX/W45<br>(Microarray) | W45<br>(qRT-PCR) | TTX/W15<br>(Microarray) | W15<br>(qRT-PCR) | W5<br>(1-step qRT-PCR) | Pol II bound? | Enrichment Index |
|-----------|-------------------------|------------------|-------------------------|------------------|------------------------|---------------|------------------|
| Npas4     | 100                     | 289.27 ± 14.43   | 43.416                  | 49.75 ± 3.36     | 35.39 ± 22.95          | Yes           | 4.288673478      |
| Fos       | 81.67533                | 61.73 ± 5.48     | 26.34377                | 16.21 ± 2.07     | 37.42 ± 3.21           | Yes           | 8.526184539      |
| Junb      | 30.52895                | Not tested       | 8.8431                  | Not tested       | Not tested             | Yes           | 12.99797382      |
| Egr4      | 36.69477                | 35.30 ± 4.27     | 4.13121                 | 5.44 ± 1.54      | 5.29 ± 0.12            | Untestable    | Not Applicable   |
| ania-5    | 5.05034                 | Not tested       | 4.13121                 | Not tested       | Not tested             | Yes           | 4.567680798      |
| Egr1      | 17.55808                | 23.63 ± 2.86     | 4.08613                 | 6.64 ± 2.01      | 16.73 ± 7.68           | Yes           | 1.767444135      |
| Mbnl2     | 1.93784                 | Not tested       | 3.66576                 | Not tested       | Not tested             | Yes           | 8.771948221      |
| NR4a3     | 2.6527                  | Not tested       | 3.00364                 | Not tested       | 2.66 ± 0.98            | Yes           | 4.224707796      |
| Arc       | 37.57973                | 38.97 ± 3.70     | 2.99679                 | 4.34 ± 1.20      | 6.57 ± 0.73            | Yes           | 4.981831136      |
| Arf4      | 2.0532                  | Not tested       | 2.78191                 | Not tested       | 0.94 ± 0.05            | Yes           | 4.408050554      |
| Gadd45g   | 6.46392                 | 8.74 ± 2.25      | 2.3584                  | 2.84 ± 0.80      | 4.41 ± 0.98            | Yes           | 9.039220131      |
| Egr2      | 17.88106                | 27.08 ± 3.47     | 2.12732                 | 4.06 ± 1.22      | 9.52 ± 1.39            | No            | Not Applicable   |
| Arih1     | -1.19927                | Not tested       | 2.10271                 | Not tested       | Not tested             | Yes           | 13.65576914      |
| Ier2      | 4.51723                 | 7.61 ± 1.68      | 1.95318                 | 2.71 ± 0.76      | 1.13 ± 0.54            | Yes           | 28.73494834      |
| Olr670    | 2.14754                 | Not tested       | 1.88824                 | Not tested       | 0.95 ± 0.65            | No            | Not Applicable   |
| Cyr61     | 18.48776                | Not tested       | 1.86446                 | Not tested       | 4.11 ± 1.31            | Yes           | 4.26759189       |
| Gadd45b   | 5.68986                 | Not tested       | 1.68739                 | Not tested       | 2.00 ± 0.22            | Yes           | 19.31577307      |
| Nup98     | 2.00291                 | Not tested       | 1.59909                 | Not tested       | 2.00 ± 0.61            | Yes           | 3.154277339      |
| Egr3      | 2.23405                 | 4.53 ± 0.91      | 1.59169                 | 1.72 ± 0.04      | 1.23 ± 0.36            | No            | Not Applicable   |
| Fosl2     | 3.20344                 | Not tested       | 1.42321                 | Not tested       | 0.96 ± 0.21            | No            | Not Applicable   |
| Rasl11a   | 5.26561                 | Not tested       | 1.41099                 | Not tested       | 1.13 ± 0.27            | No            | Not Applicable   |
| Nur77     | 17.19182                | 22.56 ± 3.09     | 1.32137                 | 1.38 ± 0.64      | 1.63 ± 0.27            | No            | Not Applicable   |
| Jun       | 2.02566                 | Not tested       | 1.31136                 | Not tested       | 0.92 ± 0.54            | Yes           | 1.079444247      |
| Ccno      | 2.04537                 | Not tested       | 1.31025                 | Not tested       | 1.06 ± 0.26            | No            | Not Applicable   |
| Nfkbid    | 3.1718                  | Not tested       | 1.28987                 | Not tested       | 1.10 ± 0.32            | No            | Not Applicable   |
| Dusp1     | 6.10034                 | Not tested       | 1.2608                  | Not tested       | 2.59 ± 0.66            | Yes           | 6.885184997      |
| Dusp6     | 3.20723                 | Not tested       | 1.26074                 | Not tested       | 2.84 ± 0.37            | Yes           | 8.384672123      |
| Trib1     | 2.12475                 | Not tested       | 1.25472                 | Not tested       | 1.35 ± 0.27            | Yes           | 7.916895262      |
| Kcnf1     | 2.5827                  | Not tested       | 1.24604                 | Not tested       | 0.89 ± 0.48            | No            | Not Applicable   |
| PPP1r15a  | 2.47382                 | Not tested       | 1.21186                 | Not tested       | 2.84 ± 0.23            | Yes           | 9.978221114      |
| Nurr1     | 3.25785                 | 5.25 ± 1.62      | 1.18654                 | 1.05 ± 0.33      | 1.50 ± 0.22            | Yes           | 2.928315575      |
| Fam46b    | 2.97462                 | Not tested       | 1.17824                 | Not tested       | 0.78 ± 0.44            | No            | Not Applicable   |
| Ch25h     | 9.21442                 | Not tested       | 1.17386                 | Not tested       | 0.97 ± 0.26            | No            | Not Applicable   |
| Btg2      | 4.96648                 | Not tested       | 1.14577                 | Not tested       | 2.52 ± 0.35            | Yes           | 11.63384642      |

|            |         |             |          |             |             |     |                |
|------------|---------|-------------|----------|-------------|-------------|-----|----------------|
| Fam46a     | 2.55448 | Not tested  | 1.12997  | Not tested  | 0.96 ± 0.41 | No  | Not Applicable |
| Nfil3      | 3.06302 | Not tested  | 1.12444  | Not tested  | 1.57 ± 0.55 | No  | Not Applicable |
| Ifng       | 2.09574 | Not tested  | 1.09689  | Not tested  | 1.49 ± 0.42 | No  | Not Applicable |
| Klf4       | 4.59757 | Not tested  | 1.06465  | Not tested  | 1.17 ± 0.21 | No  | Not Applicable |
| Tiparp/RM1 | 3.04924 | Not tested  | 1.01633  | Not tested  | 1.53 ± 0.54 | Yes | 13.12251472    |
| Dusp5      | 2.92218 | Not tested  | 1.01407  | Not tested  | 1.68 ± 0.30 | Yes | 2.310284289    |
| Fbxo33     | 2.0987  | Not tested  | 1.00735  | Not tested  | 2.13 ± 0.30 | Yes | 5.460038024    |
| Fosl1      | 6.26492 | Not tested  | 1.00247  | Not tested  | 0.91 ± 0.35 | No  | Not Applicable |
| Cartpt     | 2.03459 | Not tested  | -1.01111 | Not tested  | 1.26 ± 0.25 | No  | Not Applicable |
| Maff       | 2.63431 | Not tested  | -1.02721 | Not tested  | 1.17 ± 0.25 | No  | Not Applicable |
| Cox2/Ptgs2 | 2.1927  | Not tested  | -1.03256 | Not tested  | 1.39 ± 0.23 | No  | Not Applicable |
| Klf14      | 2.0284  | Not tested  | -1.06298 | Not tested  | 0.89 ± 0.41 | No  | Not Applicable |
| Vgf        | 2.32727 | 3.62 ± 1.03 | -1.1278  | 1.27 ± 0.45 | 1.21 ± 0.29 | Yes | 4.518959013    |
| Bdnf       | 5.19267 | Not tested  | -1.14391 | Not tested  | 0.80 ± 0.38 | No  | Not Applicable |
| Edn1       | 7.33345 | Not tested  | -1.24776 | Not tested  | 1.10 ± 0.22 | No  | Not Applicable |

## Intron-based primers

| Rat Gene      |                           | Amplicon | Notes                                                  |
|---------------|---------------------------|----------|--------------------------------------------------------|
| <b>Arc</b>    |                           |          |                                                        |
| Forward       | GAATTTGCTATGCCAACTCACGGG  | 92 bp    | This amplicon spans arc intron 1 and exon 2.           |
| Reverse       | AGTCATGGAGCCGAAGTCTGCTTT  |          |                                                        |
| <b>Arf4</b>   |                           |          |                                                        |
| Forward       | CACAGTTTGGGATGTTGGTGGTCA  | 87 bp    | This amplicon spans exon 3 and intron 3.               |
| Reverse       | TGTACGGCATTCTCACCTGGGTA   |          |                                                        |
| <b>BDNF</b>   |                           |          |                                                        |
| Forward       | TGTCTCTGCTTCCTTCCCACAGTT  | 123 bp   | This amplicon spans the last intron and the last exon. |
| Reverse       | TGGACGTTTGCTTCTTTCATGGGC  |          |                                                        |
| <b>Btg2</b>   |                           |          |                                                        |
| Forward       | CTCTCTCTTTGTTTCCTCCACAG   | 99 bp    | This amplicon spans intron 1 and exon 2.               |
| Reverse       | TGTGGTTGATGCGGATACAGCGAT  |          |                                                        |
| <b>Cartpt</b> |                           |          |                                                        |
| Forward       | TGCAGGAAGTCCTGAAGAAGCTCA  | 111 bp   | This amplicon spans exon 2 and intron 2.               |
| Reverse       | TCCTGCCAAAGTAAGGGAAGAGGA  |          |                                                        |
| <b>Ccno</b>   |                           |          |                                                        |
| Forward       | TCGGATTTAAGGCTAGGCGGGTTT  | 86 bp    | This amplicon spans intron 1 and exon 2.               |
| Reverse       | TGCACTTCTACCTGCAACGCAAGA  |          |                                                        |
| <b>cFos</b>   |                           |          |                                                        |
| Forward       | ACAGCCTTTCCTACTACCATTCCC  | 88 bp    | This amplicon spans arc intron 1 and exon 1.           |
| Reverse       | CTGCACAAAGCCAACTCACCTGT   |          |                                                        |
| <b>Cox2</b>   |                           |          |                                                        |
| Forward       | TACATCCTGACCCACTTCAAGGGA  | 125 bp   | This amplicon spans exon 3 and intron 3.               |
| Reverse       | TGTTTCGATGCTGGAGAACAAGGGA |          |                                                        |
| <b>Cyr61</b>  |                           |          |                                                        |
| Forward       | ATGTATGAGTTTCAGCGTGTGGCG  | 85 bp    | This amplicon spans intron 2 and exon 3.               |

Reverse GTCTGCCTTCTGACTGAGCTGTAA

### Dusp1

Forward CTCTACGACCAGGTTAGTAGGAGT  
Reverse ACAGCCGCTTTCTCTATTCTCCCT

108 bp

This amplicon spans exon 2 and intron 2.

### Dusp5

Forward GACCAGCTTATGACCAGGTATGTG  
Reverse AATGGGATGTGAGGAAGGAGCAGA

68 bp

This amplicon spans exon 2 and intron 2.

### Dusp6

Forward TCCTGTGCCTCTCACAAGCTGAAA  
Reverse AACTTACTGAAGCCACCTGCCAGA

89 bp

This amplicon spans exon 2 and intron 1.

### Edn1

Forward TGTCTACTTCTGCCACCTGGACAT  
Reverse ATGGCTAGGACTACAATGCCCTCT

79 bp

This amplicon spans exon 2 and intron 2.

### Egr2

Forward TCCACGTGCCTGTATTCTCATCGT  
Reverse AGCTACTCGGATATGGGAGATCCA

123 bp

This amplicon spans intron 1 and exon 2.

### Egr3

Forward TGTGAGTTCTGTGGGCGCAAGTTT  
Reverse AAAGAAGGGATCTGAGAGGCGGAT

188 bp

This amplicon spans exon 2 and intron 2.

### Egr4

Forward TCCTTTGGCAGGCGACTTCTTGA  
Reverse CCAGGAAGCAGGAGTCTGTTAAGT

80 bp

This amplicon spans intron 1 and exon 2.

### Fam46a

Forward TCGTGCTGGATTGCCTGTTAGACT  
Reverse AAGCCATCAGGTGGCTTTACCTT

95 bp

This amplicon spans exon 2 and intron 2.

|                |                            |        |                                                |
|----------------|----------------------------|--------|------------------------------------------------|
| <b>Fam46b</b>  |                            |        |                                                |
| Forward        | ATTAATCCCGGAGGTTGTTGGTGC   | 105 bp | This amplicon spans exon 2 and intron 1.       |
| Reverse        | TGCAGTCCCTGTTCTTCCAAGCTA   |        |                                                |
| <b>Fbxo33</b>  |                            |        |                                                |
| Forward        | GCATCTACTTGGAGCTGGTGTGTTGT | 67 bp  | This amplicon spans exon 2 and intron 2.       |
| Reverse        | TCCACGCAAGCCTACCTGTTGTT    |        |                                                |
| <b>Fosl1</b>   |                            |        |                                                |
| Forward        | CCTGTGAGCAGGTAAGGAACAGAGAT | 90 bp  | This amplicon spans exon 2 and intron 2.       |
| Reverse        | ATCCCTCATAGCAAGATCCAGCC    |        |                                                |
| <b>Fosl2</b>   |                            |        |                                                |
| Forward        | TGCCTTCGGATTGTGGTATGTCCT   | 47 bp  | This amplicon spans exon 3 and intron 3.       |
| Reverse        | TGACCAGTTCACAGACAGCAGACA   |        |                                                |
| <b>Gadd45b</b> |                            |        |                                                |
| Forward        | TCCCTCTGACACTCCTTCTTTCCCT  | 128 bp | This amplicon spans intron 1 and exon 2.       |
| Reverse        | GCAGAACGATTGGATCAGGGTGAA   |        |                                                |
| <b>Gadd45g</b> |                            |        |                                                |
| Forward        | ACTCACGGCGCTTGTTCTTTCACA   | 125 bp | This amplicon spans intron 1 and exon 2.       |
| Reverse        | ATTCAGGACTTTGGCGGACTCGTA   |        |                                                |
| <b>GAPDH</b>   |                            |        |                                                |
| Forward        | AACATGCACAGGGTACTTCGAGGA   | 120 bp | This amplicon spans GAPDH intron 2 and exon 3. |
| Reverse        | ACGACATACTCAGCACCAGCATCA   |        |                                                |
| <b>Ifng</b>    |                            |        |                                                |
| Forward        | TGTTTCCCAAGGACGGTAACACGA   | 99 bp  | This amplicon spans exon 2 and intron 1.       |
| Reverse        | TGCTGATGGCCTGGTTGTCTTTCA   |        |                                                |
| <b>Klf4</b>    |                            |        |                                                |
| Forward        | GTGTGCTTCACCCAGCAAGTCAAT   | 121 bp | This amplicon spans exon 2 and intron 1.       |
| Reverse        | AGTCGCTTCATGTGAGAGAGTTCC   |        |                                                |

|                 |                            |        |                                          |
|-----------------|----------------------------|--------|------------------------------------------|
| <b>Maff</b>     |                            |        |                                          |
| Forward         | ATCCCTTATCCAGCAAAGCCCTGA   | 90 bp  | This amplicon spans exon 2 and intron 2. |
| Reverse         | GGGCTTCCAGTTAGGAAAGGTGGAAA |        |                                          |
| <b>Nfil3</b>    |                            |        |                                          |
| Forward         | AGTCGAAAGAACAGCTTCGTGGGT   | 87 bp  | This amplicon spans exon 1 and intron 1. |
| Reverse         | AAGCCAACCTGAACTTGCCTGACTC  |        |                                          |
| <b>Npas4</b>    |                            |        |                                          |
| Forward         | GTTGCATCAACTCCAGAGCCAAGT   | 63 bp  | This amplicon spans intron 7 and exon 7. |
| Reverse         | ACATTTGGGCTGGACCTACCTTCA   |        |                                          |
| <b>NR4a3</b>    |                            |        |                                          |
| Forward         | AAGATACCCTCCAGGTAGGTCCGAA  | 70 bp  | This amplicon spans exon 2 and intron 2. |
| Reverse         | TGTTGGTTTCTCCACCCATTTCCC   |        |                                          |
| <b>Nup98</b>    |                            |        |                                          |
| Forward         | GGGCTTTGGTACAACGTCAACA     | 149 bp | This amplicon spans exon 2 and intron 1. |
| Reverse         | GCTACACTGAGTTAAGCCAGCTAC   |        |                                          |
| <b>Nur77</b>    |                            |        |                                          |
| Forward         | ACCAACTCTTCTGGCTTCCCTTAC   | 118bp  | This amplicon spans intron 1 and exon 2. |
| Reverse         | GGCTGGTTGCTGGTGTTCATATT    |        |                                          |
| <b>Nurr1</b>    |                            |        |                                          |
| Forward         | CGACATTTCTGCCTTCTCCTGCAT   | 124 bp | This amplicon spans exon 6 and intron 6. |
| Reverse         | TGTGATTAGGGAAAGCCATGACCG   |        |                                          |
| <b>Ppp1r15a</b> |                            |        |                                          |
| Forward         | ACAATGACTCAGTGCTGTGACCTG   | 135 bp | This amplicon spans exon 2 and intron 1. |
| Reverse         | AGAAAGAGTGGGCTTCCTTCCAGT   |        |                                          |
| <b>RasL11a</b>  |                            |        |                                          |
| Forward         | ACCAGTGATGTGAAGGGAGTGGTT   | 90 bp  | This amplicon spans exon 2 and intron 2. |
| Reverse         | ATGCCAATGAATGTGCTTCCTCCC   |        |                                          |
| <b>Sgk1</b>     |                            |        |                                          |



|                |                            |        |                                          |
|----------------|----------------------------|--------|------------------------------------------|
| Forward        | CAAAGCACATGTTTGCTGTGCGGA   | 95 bp  | This amplicon spans intron 8 and exon 9. |
| Reverse        | TTATGGAGGACCTCAGGAGCCAGATA |        |                                          |
| <b>Tiparp</b>  |                            |        |                                          |
| Forward        | CACCTTTCTTCCTTTCCCTGGTAGG  | 83 bp  | This amplicon spans exon 2 and intron 1. |
| Reverse        | CGGTGGTTTCCATGTCCATGATGT   |        |                                          |
| <b>Trib1</b>   |                            |        |                                          |
| Forward        | TAAACCGGTGACTTTCTCTCCGCA   | 117 bp | This amplicon spans exon 2 and intron 1. |
| Reverse        | AGGATCACTTCCACGATGCCAGTA   |        |                                          |
| <b>Vgf</b>     |                            |        |                                          |
| Forward        | TTGCGAGCGTTCTCTGACCATTTG   | 80 bp  | This amplicon spans intron 2 and exon 2. |
| Reverse        | CCCGAAGAGAAACGTTTAGCAGAG   |        |                                          |
| <b>Zif268</b>  |                            |        |                                          |
| Forward        | TTCGGCTCTCATCGTCCAGTGATT   | 141 bp | This amplicon spans intron 1 and exon 2. |
| Reverse        | AACCGGGTAGTTTGGCTGGGATAA   |        |                                          |
| <b>Zscan10</b> |                            |        |                                          |
| Forward        | TTCCAAGGATCCCTCAACATCTCG   | 181 bp | This amplicon spans exon 1 and intron 1. |
| Reverse        | ACCAGTAGGTTCCCAAACACCCTT   |        |                                          |

| Exon-based primers | Primers and corresponding NCBI database entry # | Amplicon size |
|--------------------|-------------------------------------------------|---------------|
| <b>NELF-A</b>      | NM_001008339                                    |               |
| Forward            | TTCCCTGACACAGGCTCCTTGAAT                        | 142 bp        |
| Reverse            | TCTTGTTCAAGTACTGGCACTCCA                        |               |
| <b>GAPDH</b>       | NM_017008                                       |               |
| Forward            | AGAGACAGCCGCATCTTCTTG                           | 99 bp         |
| Reverse            | GGTAACCAGGCGTCCGATAC                            |               |
| <b>Arc</b>         | NM_019361                                       |               |
| Forward            | ATCCTGCAGATTGGTAAGTGCCGA                        | 157 bp        |
| Reverse            | GCACATAGCCGTCCAAGTTGTTCT                        |               |

All of the following additional genes were tested for induction after TTX withdrawal.

|                     |                          |        |
|---------------------|--------------------------|--------|
| <b>cFos</b>         | NM_022197                |        |
| Forward             | ACGGAGAATCCGAAGGGAAAGGAA | 125 bp |
| Reverse             | TCTGCAACGCAGACTTCTCGTCTT |        |
| <b>c-Jun</b>        | NM_021835                |        |
| Forward             | GGAACAGGTGGCACAGCTTAAACA | 82 bp  |
| Reverse             | TTGCAACTGCTGCGTTAGCATGAG |        |
| <b>Egr1/Zif268</b>  | NM_012551                |        |
| Forward             | TCTGAATAACGAGAAGGCGCTGGT | 122 bp |
| Reverse             | ACAAAGTGTGGCCACTGTTGGGTG |        |
| <b>Nurr1</b>        | NM_019328                |        |
| Forward             | AGGTTCCAGGCAAACCCTGACTAT | 117 bp |
| Reverse             | AATCTTCTCTGCCACCCTCTGAT  |        |
| <b>Nur77/NGFI-b</b> | NM_024388                |        |
| Forward             | GACAACGCTTCGTGCCAGCATTAT | 71 bp  |
| Reverse             | ACTGTGCGCTTGAAGAAGCCTTTG |        |
| <b>Ier2</b>         | NM_001009541             |        |
| Forward             | ACTGTCCCTTCCTTGGTTTGGAGA | 114 bp |

|                |                          |        |
|----------------|--------------------------|--------|
| Reverse        | GCCGAAACGCGAATGCTAGTGAAA |        |
| <b>Egr2</b>    | NM_053633                |        |
| Forward        | TGTGGCCCTAGAACAGTGAATGGA | 113 bp |
| Reverse        | TTGCTTTGTCCTTCCCGACATTGC |        |
| <b>Ch25h</b>   | NM_001025415             |        |
| Forward        | ATGTGTTTCTGCAGCCCGACAAAG | 102 bp |
| Reverse        | AAGGACACTGGGACGAGTTGGAAT |        |
| <b>Olr670</b>  | NM_001000633             |        |
| Forward        | GTTGCCCTTCTGTGGACCCAATTT | 122 bp |
| Reverse        | TAGACCCACTGTTGGCAAAGACCA |        |
| <b>Gadd45g</b> | AB020978                 |        |
| Forward        | CGGGAAAGCATTGCACGAACTTCT | 88 bp  |
| Reverse        | ATTCAGGACTTTGGCGGACTCGTA |        |
| <b>Vgf</b>     | NM_030997                |        |
| Forward        | ACACCCTTATCCAAGGCGTACCAA | 125 bp |
| Reverse        | ACCTGAGCTAACCCTTGTTGAAGC |        |
| <b>Dusp6</b>   | NM_053883                |        |
| Forward        | ACCAGGCTGCTTTCTTTGTGTGTG | 117 bp |
| Reverse        | AATGGAGCAAATCTCTCCCTCCGT |        |

## Primers for ChIP

| Promoter   | Primer #      | Primer sequence            | Distance from TSS | Amplicon size |
|------------|---------------|----------------------------|-------------------|---------------|
| <b>Arc</b> | Primer set #1 |                            |                   |               |
|            | Forward       | TGTAGGTGTGTGAACAAAGGTGGG   | Minus 1468        | 109bp         |
|            | Reverse       | ATGCCTCCACTCACTCACAGTCTT   |                   |               |
| <b>Arc</b> | Primer set #2 |                            | Minus 489         | 119bp         |
|            | Forward       | GGCACTTCTGAGGTTGCATACTGT   |                   |               |
|            | Reverse       | ATTTGCCCTCAGGGTCTGATCTCT   |                   |               |
| <b>Arc</b> | Primer set #3 |                            | Minus 312         | 122 bp        |
|            | Forward       | ATAACCTGCCTTAGCTTCACCCTC   |                   |               |
|            | Reverse       | TTCACAGCCCGGAGTACTAATGT    |                   |               |
| <b>Arc</b> | Primer set #4 |                            | Minus 8           | 64 bp         |
|            | Forward       | TTTAGTGCAGTGCTCTGGCGAGTAGT |                   |               |
|            | Reverse       | TCAAGCTGAAGAGGCCAGAGA      |                   |               |
| <b>Arc</b> | Primer set #5 |                            | Plus 180          | 56bp          |
|            | Forward       | TTCTTAGCCTGTCCCGAACCGTAA   |                   |               |
|            | Reverse       | TCATATGGTCCAGCTCCATCTGCT   |                   |               |
| <b>Arc</b> | Primer set #6 |                            | Plus 214          | 93bp          |
|            | Forward       | AGATGGAGCTGGACCATATGACGA   |                   |               |
|            | Reverse       | TCTGCAGGATCACATTGGGTTTGG   |                   |               |
| <b>Arc</b> | Primer set #7 |                            | Plus 297          | 83bp          |
|            | Forward       | ATCCTGCAGATTGGTAAGTGCCGA   |                   |               |
|            | Reverse       | TTGGACACTTCGGTCAACAGATGC   |                   |               |
| <b>Arc</b> | Primer set #8 |                            | Plus 2195         | 92bp          |
|            | Forward       | GAATTTGCTATGCCAACTCACGGG   |                   |               |
|            | Reverse       | AGTCATGGAGCCGAAGTCTGCTTT   |                   |               |
| <b>Arc</b> | Primer set #9 |                            | Plus 2749         | 115 bp        |
|            | Forward       | CTGCACAGAGGTTCCAAGACACTT   |                   |               |
|            | Reverse       | TGGCTTGTCTTCACCTTCAGCTCT   |                   |               |

|               |                                     |                                                       |               |        |
|---------------|-------------------------------------|-------------------------------------------------------|---------------|--------|
| <b>cFos</b>   | Primer set #1<br>Forward<br>Reverse | AGGTTTGTGGTTCTGCACCTCTTG<br>AACTAACTGGTGGGCATTCCGAGA  | Minus 1480bp  | 91 bp  |
| <b>cFos</b>   | Primer set #2<br>Forward<br>Reverse | TTCTATAAAGCGGCCAGCTGAGG<br>GGCTCTATCCAGTCTTCTCAGTTGCT | Minus 53 bp   | 78 bp  |
| <b>cFos</b>   | Primer set #3<br>Forward<br>Reverse | AGCGCGTGCACACTTGTCACTA<br>AGAGCGCAGGACACTCAGAGTAAA    | Plus 437 bp   | 79 bp  |
| <b>cFos</b>   | Primer set #4<br>Forward<br>Reverse | TGAACAGAGGTGACACTAGACCAC<br>TCCTTTCCCTTCGGATTCTCCGT   | Plus 857 bp   | 99 bp  |
| <b>Zif268</b> | Primer set #1<br>Forward<br>Reverse | TCACCAGACTGGCCAAAGCAAAGT<br>GTTGGTTCTTGTGATGGTTGGCA   | Minus 1138 bp | 112 bp |
| <b>Zif268</b> | Primer set #2<br>Forward<br>Reverse | CCCGTGCTGTTTCAGACCCTTGAAAT<br>AAGTTCTGCGCGCTGGGATCTCT | Minus 62 bp   | 72 bp  |
| <b>Zif268</b> | Primer set #3<br>Forward<br>Reverse | GCAATTGATGTCTCCGCTGCAGAT<br>CAGCAGCATCATCTCCTCCAGTTT  | Plus 291 bp   | 100 bp |
| <b>Zif268</b> | Primer set #4<br>Forward<br>Reverse | TTCGGCTCTCATCGTCCAGTGATT<br>AACCGGGTAGTTTGGCTGGGATAA  | Plus 1182     | 141 bp |
| <b>Egr3</b>   | Primer set #1<br>Forward<br>Reverse | TTCAACTGAGAGTCAGTGCAGGGT<br>TCGAGCCGACTTCATTCCGATTCA  | Minus 1360 bp | 84 bp  |

|                |                                     |                                                      |              |        |
|----------------|-------------------------------------|------------------------------------------------------|--------------|--------|
| <b>Egr3</b>    | Primer set #2<br>Forward<br>Reverse | GGAGTGCTATGACCGGCAA<br>TTAGCAAAGTCTCATGGTCACCG       | Minus 8 bp   | 60 bp  |
| <b>Egr3</b>    | Primer set #3<br>Forward<br>Reverse | AGGGAGAGAGCTAGCGATGTATGC<br>TCTTCCATCCGTCTCTCCATCCA  | Plus 212 bp  | 73 bp  |
| <b>Egr3</b>    | Primer set #4<br>Forward<br>Reverse | TGTGAGTTCTGTGGGCGCAAGTTT<br>AAAGAAGGGATCTGAGAGGCGGAT | Plus 2531 bp | 188bp  |
| <b>Gadd45g</b> | Primer set #1<br>Forward<br>Reverse | TTCACCACCCACCTAGAGAACA<br>AGACAGGCAGAGAGACACAGAA     | Minus 1706bp | 64 bp  |
| <b>Gadd45g</b> | Primer set #2<br>Forward<br>Reverse | CGCGGATCGTCTTTGGGAATCTTT<br>CATTGTGCGATCCACGAACAGCAA | 0 bp         | 91 bp  |
| <b>Gadd45g</b> | Primer set #3<br>Forward<br>Reverse | CGGAAAGCATTGCACGAACCTTCT<br>ATTCAGGACTTTGGCGGACTCGTA | Plus 634 bp  | 88 bp  |
| <b>Gadd45g</b> | Primer set #4<br>Forward<br>Reverse | TGGAGAAGCTCAGTTTGTCTGCG<br>AGTGTCACCAAGTCGATCAGACCA  | Plus 1178 bp | 118 bp |
| <b>Cox2</b>    | Primer set #1<br>Forward<br>Reverse | AATGCGGTGGACACTTAGCATTCC<br>AGTCTTTCACCGAACTGTCCTCCA | Minus 807    | 114 bp |
| <b>Cox2</b>    | Primer set #2<br>Forward<br>Reverse | TCTGCGATGCTCTTCCGAGCTGT<br>AAGCCACTCACTCACCTGCAT     | Minus 6 bp   | 73 bp  |
| <b>Cox2</b>    | Primer set #3                       |                                                      | Plus 791 bp  | 87 bp  |

|              |               |                          |               |        |
|--------------|---------------|--------------------------|---------------|--------|
|              | Forward       | CCTTGCTGTTCCAACCCATGTCAA |               |        |
|              | Reverse       | TCCAGTCCGGGTACAGTCACATTT |               |        |
| <b>Cox2</b>  | Primer set #4 |                          | Plus 1081 bp  | 125 bp |
|              | Forward       | TACATCCTGACCCACTTCAAGGGA |               |        |
|              | Reverse       | TGTTCGATGCTGGAGAACAAGGGA |               |        |
| <b>Ier2</b>  | Primer set #1 |                          | Minus 1706 bp | 105 bp |
|              | Forward       | AATTGGAGAGGTGTGGTCCACGAT |               |        |
|              | Reverse       | ACCCACTTCCGGATGCCCATATAA |               |        |
| <b>Ier2</b>  | Primer set #2 |                          | Minus 45 bp   | 102 bp |
|              | Forward       | TAAAGGACTCCAGCTTGCTTTCCC |               |        |
|              | Reverse       | ACAATGGATTAAGACCGGCGTTGC |               |        |
| <b>Ier2</b>  | Primer set #3 |                          | Plus 618 bp   | 116 bp |
|              | Forward       | AAGGCGCTTCTCCAGTCTCTTGAA |               |        |
|              | Reverse       | GCACCAGCACGTTGAGCATATTGT |               |        |
| <b>Ier2</b>  | Primer set #4 |                          | Plus 933      | 114 bp |
|              | Forward       | ACTGTCCCTTCTTGTTTTGGAGA  |               |        |
|              | Reverse       | GCCGAAACGCGAATGCTAGTGAAA |               |        |
| <b>Dusp6</b> | Primer set #1 |                          | Minus 629 bp  | 127 bp |
|              | Forward       | GCATTTAACACTTCGTTGGGTCGC |               |        |
|              | Reverse       | TCGTGTGTGGCATTGTTTGGCTC  |               |        |
| <b>Dusp6</b> | Primer set #2 |                          | Minus 41 bp   | 116 bp |
|              | Forward       | TGTATCCATTGAGACGCTGGCTGT |               |        |
|              | Reverse       | TCGCCGATTATTCAAGACTGGGT  |               |        |
| <b>Dusp6</b> | Primer set #3 |                          | Plus 335 bp   | 125 bp |
|              | Forward       | TTGGACGTGTTGGAAGAGTTTGGC |               |        |
|              | Reverse       | TGGCTCCAGTGATCAGAGATAGGA |               |        |
| <b>Dusp6</b> | Primer set #4 |                          | Plus 1230 bp  | 89 bp  |
|              | Forward       | TCCTGTGCCTCTCACAAGCTGAAA |               |        |

|              |               |                           |               |        |
|--------------|---------------|---------------------------|---------------|--------|
|              | Reverse       | AACTTACTGAAGCCACCTGCCAGA  |               |        |
| <b>Nurr1</b> | Primer set #1 |                           | Minus 1375 bp | 64 bp  |
|              | Forward       | GCGGAGATGTGCTCAAAGTTTGCT  |               |        |
|              | Reverse       | AGATGGAGCCTACTCAAGCCACAA  |               |        |
| <b>Nurr1</b> | Primer set #2 |                           | Minus 23 bp   | 95 bp  |
|              | Forward       | TATTTCAAGGAGATCTGACGGGCT  |               |        |
|              | Reverse       | GGTGGACAGTGTTCGTAATTCAGCA |               |        |
| <b>Nurr1</b> | Primer set #3 |                           | Plus 664bp    | 75 bp  |
|              | Forward       | TCTTCGGGAGAATACAGCTCCGAT  |               |        |
|              | Reverse       | TTCAGTGTTGGTGAGGTCCATGCT  |               |        |
| <b>Nurr1</b> | Primer set #4 |                           | Plus 4358 bp  | 124 bp |
|              | Forward       | CGACATTTCTGCCTTCTCCTGCAT  |               |        |
|              | Reverse       | TGTGATTAGGGAAAGCCATGACCG  |               |        |
| <b>Egr2</b>  | Primer set #1 |                           | Minus 896 bp  | 90 bp  |
|              | Forward       | AGCAGCTCTTCTGCTCCATTCTCT  |               |        |
|              | Reverse       | GGAACAGGTCTGGGCTGTTTGTTT  |               |        |
| <b>Egr2</b>  | Primer set #2 |                           | Plus 2 bp     | 66 bp  |
|              | Forward       | GCAGGAGAGAGTCAGTGGCAGATA  |               |        |
|              | Reverse       | GCAACCAAGTTGTTGGCTTCT     |               |        |
| <b>Egr2</b>  | Primer set #3 |                           | Plus 1842 bp  | 106 bp |
|              | Forward       | ACCAGACCTTCACTTACATGGGCA  |               |        |
|              | Reverse       | TGCAAGATGCCCGCACTACAATA   |               |        |
| <b>Egr2</b>  | Primer set #4 |                           | Plus 3514 bp  | 113 bp |
|              | Forward       | TGTGGCCCTAGAACAGTGAATGGA  |               |        |
|              | Reverse       | TTGCTTTGTCCTTCCCGACATTGC  |               |        |
